# Supplementary material for: Dimerization of tris(o-ureidobenzyl)amines: a novel class of aggregates
Source: Royal Society of Chemistry journal article supplement (doi:10.1039/b007955n), 2001-01-01
Supplement: b007955n.doc [file b007955n.doc]

300 MHz 1H NMR of **1** in DMSO-d6

300 MHz 1H NMR of **1** (showing the dimer **1•1** as the only species) in CDCl3

300 MHz 1H NMR of **2** in DMSO-d6

300 MHz 1H NMR of **2**, showing a mixture of **2** and the dimer **2•2** (*), in CDCl3

300 MHz 1H NMR of **3**, showing a mixture of **3** and the dimer **3•3**(*), in CDCl3

300 MHz 1H NMR of an equimolecular mixture of **2** and **3**, showing the dimers **2•2**(*), **3•3**(*) and **2•3**(#) in CDCl3
